# Supplementary material for: Comparison of Environmental Impact and Nutritional Quality among a European Sample Population – findings from the Food4Me study
Source: PubMed Central journal article supplement (PMC5799208; doi:10.1038/s41598-018-20391-4), 2018-02-05
Supplement: 41598_2018_20391_MOESM1_ESM.pdf [file 41598_2018_20391_MOESM1_ESM.pdf]

# 1 Supplemental Information

## 2 Comparison of Environmental Impact and Nutritional Quality among a European Sample 3 Population – findings from the Food4me study

4 Christie Walker<sup>1,\*</sup>, Eileen R. Gibney<sup>2</sup>, Stefanie Hellweg<sup>1</sup>

5 <sup>1</sup> ETH Zurich, Institute of Environmental Engineering, 8093 Zürich, Switzerland

6 <sup>2</sup> University College Dublin, Institute of Food and Health, Dublin 4, Ireland

7 \* Corresponding author: Email: [walker@ifu.baug.ethz.ch](mailto:walker@ifu.baug.ethz.ch) Phone: +41 44 633 7145

### 8 Table of Contents

9 S1. Supplementary Environmental Impact Results

10 S2. Supplementary Results of Each of the Foods/Dishes Analyzed

11 S3. Supplementary Determination of Recommended Diets Results

12 S4. Supplementary Comparison of Energy Intakes

13 S5. Supplementary Scenario Analysis for Different Food Production Methods

14 S6. Supplementary Material for Data Sources, Nutrition, and Environmental Indicators

15

16 S1. Supplementary Environmental Impact Results

17 Table S1. Daily average impacts for each category and population subset. Ranges represent the standard  
18 deviation of the subset. Severity of the impact in relation to other subsets is represented through shading.  
19 A darker shade indicates relatively higher impacts while a lighter shade indicates relatively lower  
20 impacts. Italicized numbers indicate a significant difference between the male and female subsets of the  
21 specific country, or in the case of no meat and fish, no red meat, no dairy, or diet quality indicators,  
22 diets with significant differences from the TOTAL population average. Statistical significance between  
23 subsets was verified using an unpaired two sided t-test under the assumption that p-values lower than  
24 0.05 indicated statistically significant differences between the means of subsets.

|         | n=   | As consumed          |       |           |         |              |        | Adjusted to 2'000 kcal |       |           |        |              |        |
|---------|------|----------------------|-------|-----------|---------|--------------|--------|------------------------|-------|-----------|--------|--------------|--------|
|         |      | Climate Change       |       | WFP       |         | Biodiversity |        | Climate                |       | WFP       |        | Biodiversity |        |
|         |      | kgCO <sub>2</sub> eq |       | liters eq |         | PDFyr*10E-13 |        | kgCO <sub>2</sub> eq   |       | liters eq |        | PDFyr*10E-13 |        |
| TOTAL   | 1457 | 6.14                 | ±2.78 | 267.57    | ±107.63 | 48.44        | ±28.5  | 4.99                   | ±1.62 | 224.22    | ±65.71 | 39.49        | ±22.42 |
| Male    | 602  | 7.08                 | ±3.18 | 295.02    | ±119.91 | 56.29        | ±34.53 | 5.34                   | ±1.9  | 229.56    | ±72.97 | 42.77        | ±27.44 |
| Female  | 855  | 5.48                 | ±2.24 | 248.25    | ±93.42  | 42.91        | ±21.73 | 4.75                   | ±1.34 | 220.46    | ±59.83 | 37.18        | ±17.73 |
| COUNTRY |      |                      |       |           |         |              |        |                        |       |           |        |              |        |
| German  |      |                      |       |           |         |              |        |                        |       |           |        |              |        |
| Male    | 95   | 6.54                 | ±2.35 | 271.32    | ±96.65  | 48.64        | ±24.13 | 5.2                    | ±1.53 | 220.44    | ±58.47 | 38.14        | ±19.25 |
| Female  | 110  | 5.4                  | ±2.21 | 248.77    | ±87.72  | 41.37        | ±20.46 | 4.69                   | ±1.31 | 221.68    | ±60.71 | 35.78        | ±18.62 |
| Greek   |      |                      |       |           |         |              |        |                        |       |           |        |              |        |
| Male    | 85   | 5.61                 | ±2.65 | 248.78    | ±127.89 | 49.36        | ±29.16 | 4.97                   | ±1.37 | 224.39    | ±73.55 | 44.32        | ±20.71 |
| Female  | 123  | 4.76                 | ±1.91 | 220.91    | ±78.89  | 41.36        | ±22.81 | 4.6                    | ±1.33 | 214.77    | ±45.15 | 40.1         | ±18.33 |
| Irish   |      |                      |       |           |         |              |        |                        |       |           |        |              |        |
| Male    | 84   | 7.3                  | ±2.23 | 289.24    | ±91.44  | 56.38        | ±19.73 | 5.19                   | ±1.68 | 209.17    | ±74.18 | 39.85        | ±20.35 |
| Female  | 130  | 5.79                 | ±2.14 | 258.64    | ±84.15  | 43.4         | ±19.3  | 4.62                   | ±1.02 | 214.32    | ±58.09 | 34.25        | ±14.96 |
| Dutch   |      |                      |       |           |         |              |        |                        |       |           |        |              |        |
| Male    | 109  | 7.18                 | ±2.84 | 322.92    | ±110.43 | 59.33        | ±36.27 | 5.07                   | ±1.95 | 242.85    | ±74.9  | 42.8         | ±30.61 |
| Female  | 109  | 5.64                 | ±2.03 | 264.25    | ±91.07  | 45.64        | ±21.21 | 4.73                   | ±1.4  | 230.07    | ±63.35 | 38.59        | ±17.8  |
| Polish  |      |                      |       |           |         |              |        |                        |       |           |        |              |        |
| Male    | 59   | 7.49                 | ±4.63 | 297.84    | ±158.93 | 58.09        | ±53.86 | 5.4                    | ±2.51 | 218.89    | ±78.14 | 41.79        | ±37.68 |
| Female  | 142  | 5.29                 | ±2.42 | 231.62    | ±92.11  | 40.82        | ±24.01 | 4.69                   | ±1.64 | 209.09    | ±60.68 | 36.17        | ±21.48 |
| Spanish |      |                      |       |           |         |              |        |                        |       |           |        |              |        |
| Male    | 106  | 8.28                 | ±3.68 | 330.33    | ±125.27 | 70.16        | ±41.05 | 6.3                    | ±2.25 | 255.8     | ±76.3  | 54.78        | ±33.88 |

|                      |     |      |       |        |         |       |        |                    |       |        |        |       |        |
|----------------------|-----|------|-------|--------|---------|-------|--------|--------------------|-------|--------|--------|-------|--------|
| Female               | 106 | 6.22 | ±2.25 | 276.04 | ±112.1  | 50.14 | ±19.96 | 5.34               | ±1.38 | 242.67 | ±70.1  | 43.25 | ±15.67 |
| UK                   |     |      |       |        |         |       |        |                    |       |        |        |       |        |
| Male                 | 64  | 6.96 | ±3.16 | 290.59 | ±113.37 | 46.88 | ±23.25 | 5.11               | ±1.4  | 220.44 | ±62.64 | 32.4  | ±16.88 |
| Female               | 135 | 5.39 | ±2.37 | 245.46 | ±97.51  | 39.43 | ±22.04 | 4.65               | ±1.09 | 217.32 | ±55.42 | 33.62 | ±14.33 |
| DIETARY PATTERNS     |     |      |       |        |         |       |        |                    |       |        |        |       |        |
| No Meat/Fish         | 24  | 3.94 | ±1.65 | 215    | ±118.98 | 19.86 | ±10.67 | 3.62               | ±0.99 | 202.99 | ±83.47 | 17.38 | ±9.52  |
| No Red               | 94  | 4.35 | ±1.6  | 224.01 | ±92.5   | 21.87 | ±9.02  | 3.85               | ±1.00 | 205.24 | ±63.06 | 17.99 | ±9.84  |
| No Dairy             | 7   | 5.09 | ±4.1  | 288    | ±165.4  | 16.9  | ±8.74  | 4.95               | ±3.38 | 282.32 | ±138.3 | 16.58 | ±7.30  |
| DIET QUALITY         |     |      |       |        |         |       |        |                    |       |        |        |       |        |
| High MAR/<br>Low MER | 48  | 5.08 | ±0.99 | 238    | ±40.38  | 33.83 | ±14.85 | Good Quality Diets |       |        |        |       |        |
| High NRF9.3          | 481 | 4.24 | ±1.15 | 196.44 | ±52     | 32.23 | ±12.46 |                    |       |        |        |       |        |
| Good Quality         | 19  | 5.09 | ±1.03 | 238    | ±42     | 34.01 | ±15.63 |                    |       |        |        |       |        |
| High MER             | 481 | 8.39 | ±3.18 | 358.6  | ±114.5  | 67.91 | ±35.41 | Poor Quality Diets |       |        |        |       |        |
| Low NRF9.3           | 481 | 8.44 | ±3.24 | 357    | ±118    | 67.72 | ±36.32 |                    |       |        |        |       |        |
| Poor Quality         | 435 | 8.6  | ±3.23 | 366    | ±116    | 69.33 | ±35.97 |                    |       |        |        |       |        |

25

26  
27

Table S2. Average grams of food consumed for each of the subsets considered. Upper and lower limits are the 95% confidence intervals (z-value 1.96) of the standard error of the mean.

|                  | Dairy         | Fruits        | Vegetables    | Starches      | Meat and Fish | Bread         | Sweets        | Drinks (divided by 10) | Soups and Sauces | Cereal        | Eggs         | Fats and Spreads |
|------------------|---------------|---------------|---------------|---------------|---------------|---------------|---------------|------------------------|------------------|---------------|--------------|------------------|
| German Male      | 306.65 ±40.29 | 273.14 ±48.41 | 182.08 ±17.38 | 216.91 ±19.81 | 171.6 ±20.75  | 157.59 ±21.61 | 97.23 ±15.16  | 112.4 ±13.48           | 71.85 ±9.49      | 54.06 ±14.7   | 25.04 ±4.02  | 24.42 ±3.84      |
| German Female    | 347.07 ±41.56 | 302.48 ±47.55 | 209 ±28.64    | 179.46 ±16.58 | 121.64 ±14.59 | 123.89 ±20.02 | 102.93 ±18.25 | 105.35 ±10.49          | 78.02 ±10.69     | 38.71 ±10.71  | 23.73 ±4.12  | 21.24 ±3.14      |
| Greek Male       | 281.64 ±56.53 | 215.5 ±44.49  | 191.45 ±27.78 | 189.61 ±25.78 | 200.25 ±26.7  | 119.91 ±24.49 | 90.67 ±16.62  | 69.38 ±12.44           | 47.07 ±9.31      | 68.45 ±22.2   | 32.88 ±8.94  | 18.93 ±3.6       |
| Greek Female     | 250.08 ±40.06 | 239.34 ±31.13 | 214.38 ±25.6  | 150.5 ±16.44  | 160.35 ±15.74 | 107.46 ±38.78 | 90.49 ±14.61  | 63.99 ±11.64           | 48.4 ±6.69       | 50.61 ±11.38  | 22.5 ±6.37   | 20.31 ±3.08      |
| Irish Male       | 324.7 ±39.54  | 261.52 ±65.03 | 197.47 ±27.34 | 231.84 ±22.58 | 225.23 ±21.75 | 162.94 ±30.25 | 140.99 ±37.85 | 112.08 ±12.84          | 98.78 ±14.29     | 104.62 ±19.79 | 54.34 ±15.6  | 26.64 ±5.65      |
| Irish Female     | 346.82 ±38.33 | 343.24 ±51.5  | 267.32 ±29.96 | 190.22 ±16.6  | 180.53 ±15.62 | 102.36 ±13.81 | 130.96 ±26.5  | 90.1 ±9.48             | 112.42 ±12.78    | 121.69 ±21.4  | 37 ±6.72     | 18.6 ±2.49       |
| Dutch Male       | 418.67 ±58.7  | 292.61 ±43.55 | 207.91 ±25.48 | 214.99 ±26.99 | 196.43 ±36.18 | 252 ±39.37    | 98.29 ±14.45  | 131.88 ±12.67          | 97.22 ±13.39     | 89.8 ±22.17   | 38.29 ±11.96 | 23.67 ±2.9       |
| Dutch Female     | 345.78 ±50.42 | 291.89 ±37.64 | 203.96 ±22.99 | 163.01 ±13.34 | 135.31 ±12.69 | 196.09 ±30.69 | 87.5 ±15.5    | 123.01 ±10.85          | 103.27 ±13.86    | 58.69 ±17.06  | 20.59 ±4.02  | 20 ±2.55         |
| Polish Male      | 495.14 ±121.3 | 198.24 ±42.19 | 166.81 ±31.21 | 221.15 ±35.88 | 246.53 ±42.44 | 223.02 ±53.56 | 125.32 ±28.54 | 101.31 ±13.77          | 129.07 ±20.36    | 49.91 ±22.88  | 43.13 ±11.23 | 28.52 ±6.96      |
| Polish Female    | 343.58 ±41.95 | 242.24 ±34.39 | 194.91 ±27.72 | 166.9 ±22.29  | 156.34 ±17.52 | 152.49 ±31.38 | 108.11 ±22.69 | 91.94 ±8.64            | 117.61 ±16.24    | 57.5 ±13.0    | 29.48 ±4.8   | 19.2 ±3.11       |
| Spanish Male     | 409.02 ±67.73 | 258.7 ±37.4   | 232.27 ±25.53 | 207.69 ±25.82 | 323.37 ±31.28 | 165.1 ±33.26  | 118.87 ±21.35 | 91.66 ±13.69           | 87.35 ±12.85     | 38.12 ±11.42  | 39.53 ±6.35  | 16.26 ±2.45      |
| Spanish Female   | 415.11 ±60.49 | 321.43 ±58.51 | 214.86 ±22.36 | 142.21 ±17.3  | 233.42 ±17.86 | 119.39 ±26.64 | 96.14 ±14.8   | 73.91 ±7.83            | 82.99 ±20.37     | 45.59 ±15.97  | 34.7 ±4.9    | 20.44 ±4.2       |
| UK Male          | 378.97 ±59.36 | 304.08 ±77.91 | 264.44 ±34.34 | 248.62 ±43.57 | 211.39 ±23.96 | 113.9 ±22.53  | 131.58 ±41.21 | 112.3 ±17.6            | 114.63 ±22.77    | 109.45 ±39.86 | 54.07 ±17.66 | 15.6 ±2.7        |
| UK Female        | 353.72 ±37.06 | 268.2 ±37.95  | 249.03 ±31.63 | 186.72 ±18.11 | 164.38 ±17.0  | 100.37 ±21.79 | 108.34 ±17.49 | 105.52 ±10.79          | 94.93 ±12.08     | 79.23 ±14.63  | 35.12 ±8.77  | 15.74 ±2.34      |
| Total            | 353.3 ±14.06  | 274.73 ±12.48 | 215.94 ±7.54  | 188.99 ±6.05  | 189.84 ±6.46  | 146.45 ±8.29  | 107.81 ±5.85  | 98.12 ±3.25            | 91.15 ±3.94      | 71.11 ±5.2    | 33.7 ±2.21   | 20.32 ±0.92      |
| Male             | 369.67 ±24.23 | 260.23 ±19.33 | 206.32 ±10.27 | 216.97 ±10.57 | 226.06 ±12.1  | 173.01 ±13.09 | 112.8 ±9.39   | 105.06 ±5.41           | 89.75 ±5.67      | 75.6 ±8.88    | 39.83 ±4.15  | 21.87 ±1.54      |
| Female           | 341.82 ±16.81 | 284.97 ±16.31 | 222.73 ±10.61 | 169.28 ±6.85  | 164.34 ±6.45  | 127.8 ±10.52  | 104.31 ±7.46  | 93.24 ±3.99            | 92.13 ±5.4       | 68.15 ±6.34   | 29.33 ±2.33  | 19.23 ±1.13      |
| No Meat and Fish | 308.47 ±105.5 | 345.25 ±171.1 | 347.15 ±106.3 | 171.04 ±38.14 | 0 ±0.0        | 126.24 ±38.94 | 89.98 ±35.13  | 89 ±21.81              | 79.01 ±22.17     | 91.61 ±37.32  | 37.39 ±15.69 | 15.58 ±7.23      |
| No Red Meat      | 341.14 ±55.31 | 365.19 ±74.0  | 320.09 ±42.24 | 168.86 ±19.59 | 73.06 ±15.35  | 117.85 ±23.01 | 89.23 ±16.74  | 101.97 ±11.22          | 90.79 ±15.74     | 115.06 ±31.0  | 39.15 ±8.47  | 18.87 ±3.14      |

28

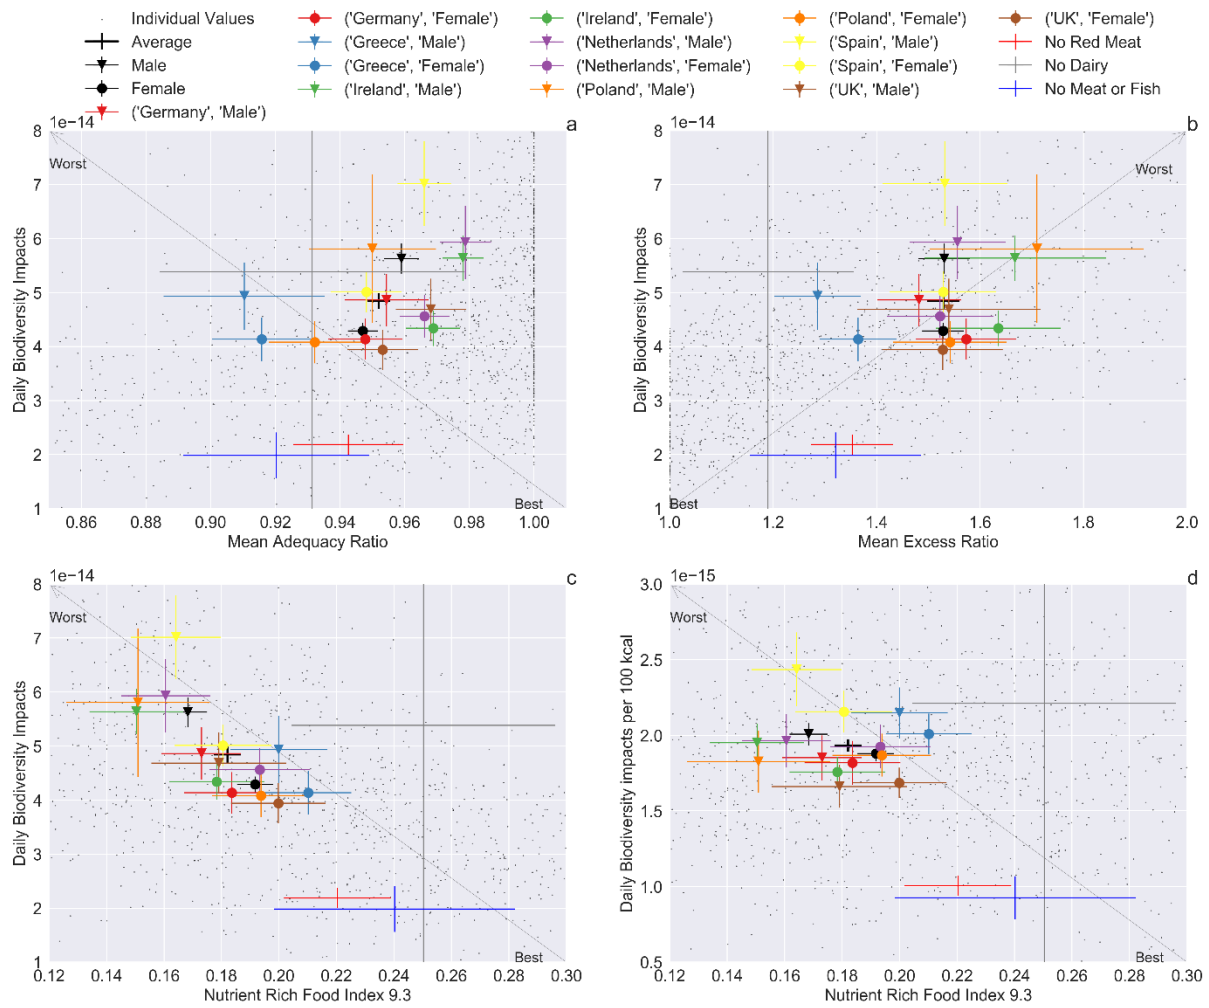

29  
30  
31  
32  
33  
34  
35  
36

Fig. S1. Relationships between impacts and nutrition. a-c show average daily biodiversity impacts (PDF\*yr) on the y-axis. d shows the environmental impacts per 100 kcal. Nutrition indicators (x-axis): a: MAR, b: MER, and c-d: NRF9.3. Each individual is marked by a gray point. Data points marked with a circle or triangle represent the female or male subset, respectively, and no marker indicates both males and females were considered for the average. Length of the error bars represent the 95% confidence interval for the standard error of the mean. See Table S1 for sample size numbers.

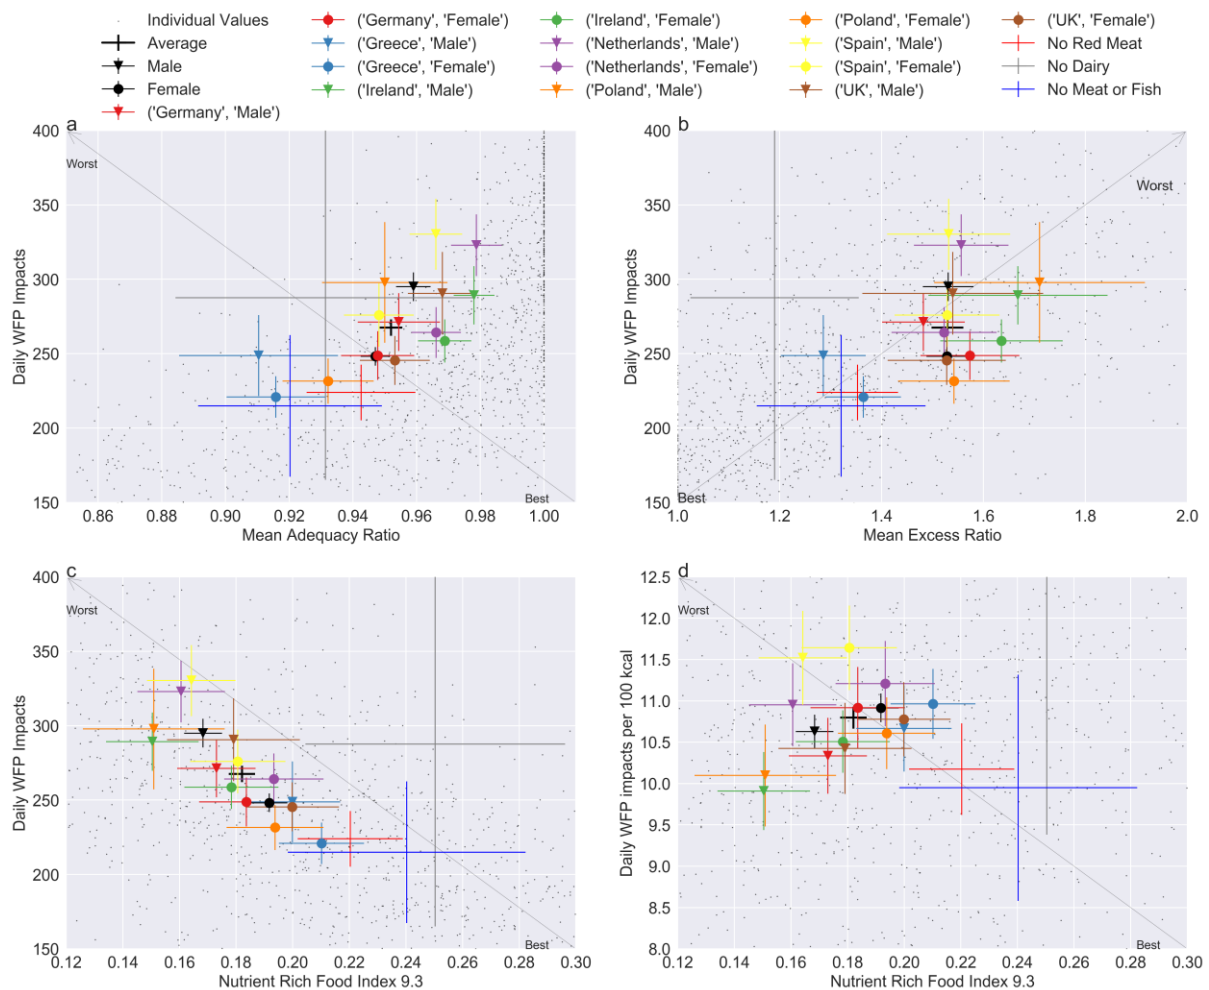

37  
 38 Fig. S2. Relationships between impacts and nutrition. a-c show average daily water scarcity footprint  
 39 impacts (liteq) on the y-axis. d shows the environmental impacts per 100 kcal. Nutrition indicators (x-  
 40 axis): a: MAR, b: MER, and c-d: NRF9.3. Each individual is marked by a gray point. Data points  
 41 marked with a circle or triangle represent the female or male subset, respectively, and no marker  
 42 indicates both males and females were considered for the average. Length of the error bars represent  
 43 the 95% confidence interval for the standard error of the mean. See Table S1 for sample size numbers.

44 S2. Supplementary Results of Each of the Foods/Dishes Analyzed:

45 Impacts per gram for each food/dish in the various food groups for each impact category are  
 46 shown in the figures below. Blue dots represent the average daily consumption (per person) of each  
 47 food/dish. Dashed lines represent the weighted average (as consumed), and solid lines show the average  
 48 regardless of consumption rates.

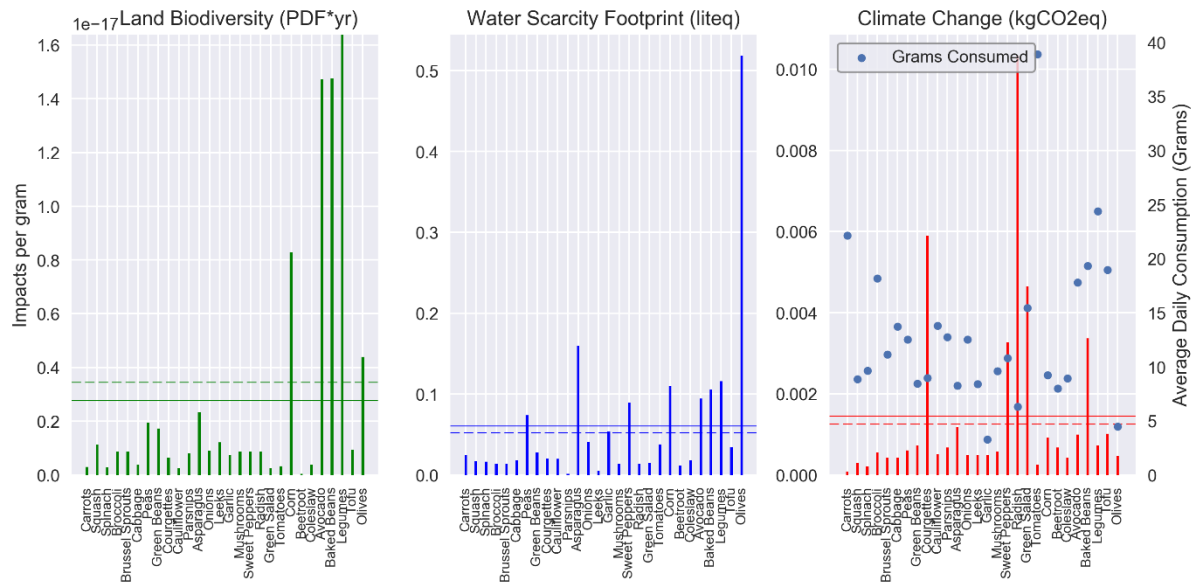

49  
 50 Fig. S3. Impacts per gram for each food/dish in the Vegetable food group for each impact category.  
 51 Blue dots represent the average daily consumption (per person) of each food/dish. Dashed lines  
 52 represent the weighted average, and solid lines show the average regardless of consumption rates.

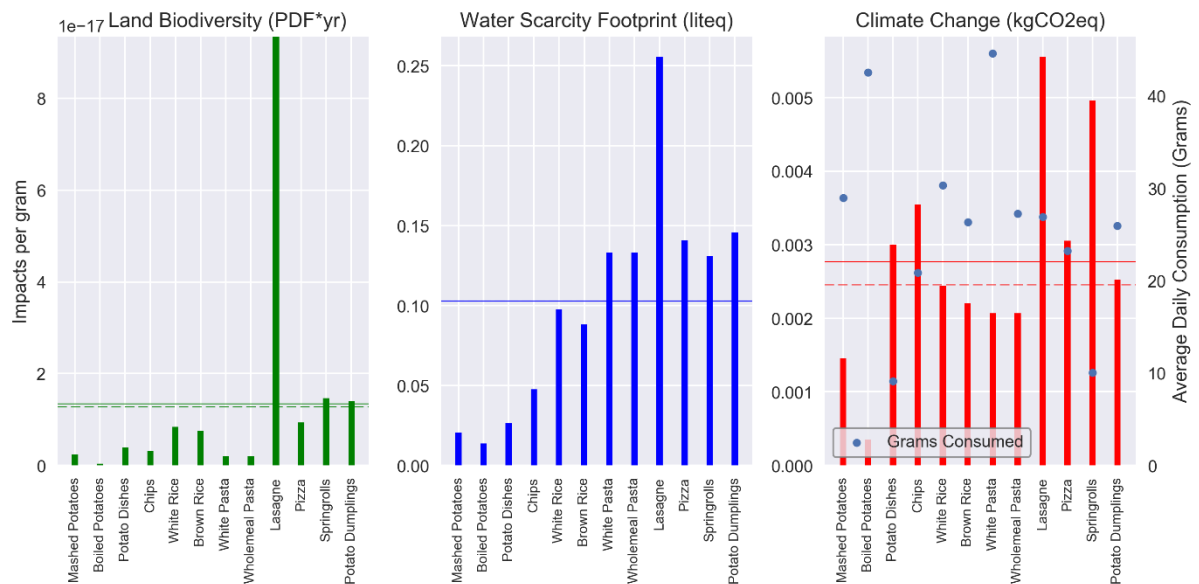

53  
 54 Fig. S4. Impacts per gram for each food/dish in the Potatoes, Rice, and Pasta food group for each impact  
 55 category. Blue dots represent the average daily consumption (per person) of each food/dish. Dashed  
 56 lines represent the weighted average, and solid lines show the average regardless of consumption rates.

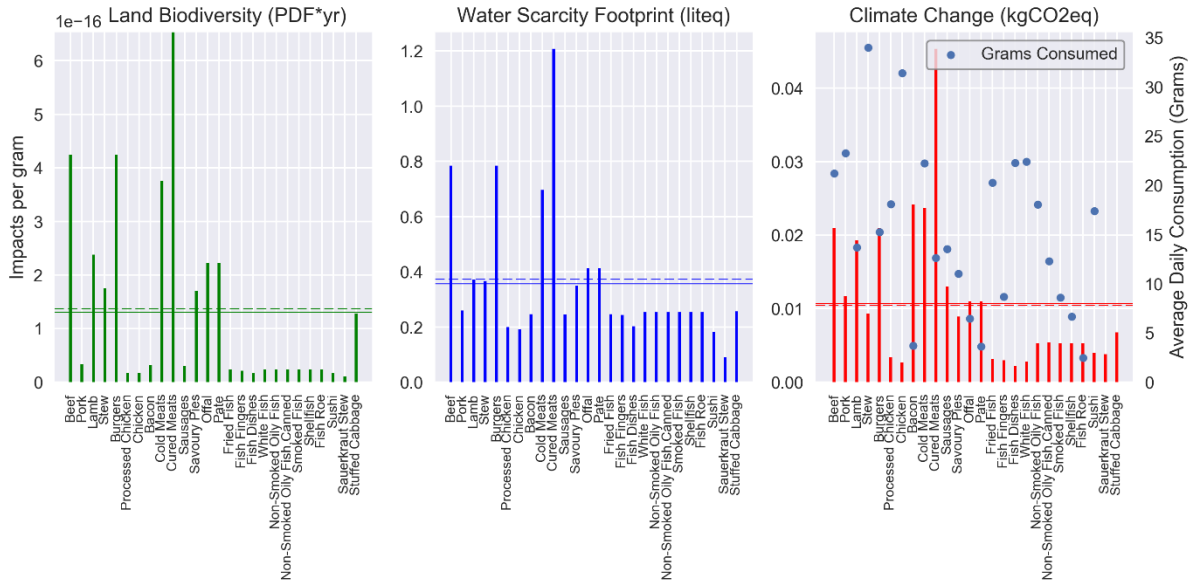

57  
 58 Fig. S5. Impacts per gram for each food/dish in the Meat and Fish food group for each impact category.  
 59 Blue dots represent the average daily consumption (per person) of each food/dish. Dashed lines  
 60 represent the weighted average, and solid lines show the average regardless of consumption rates.

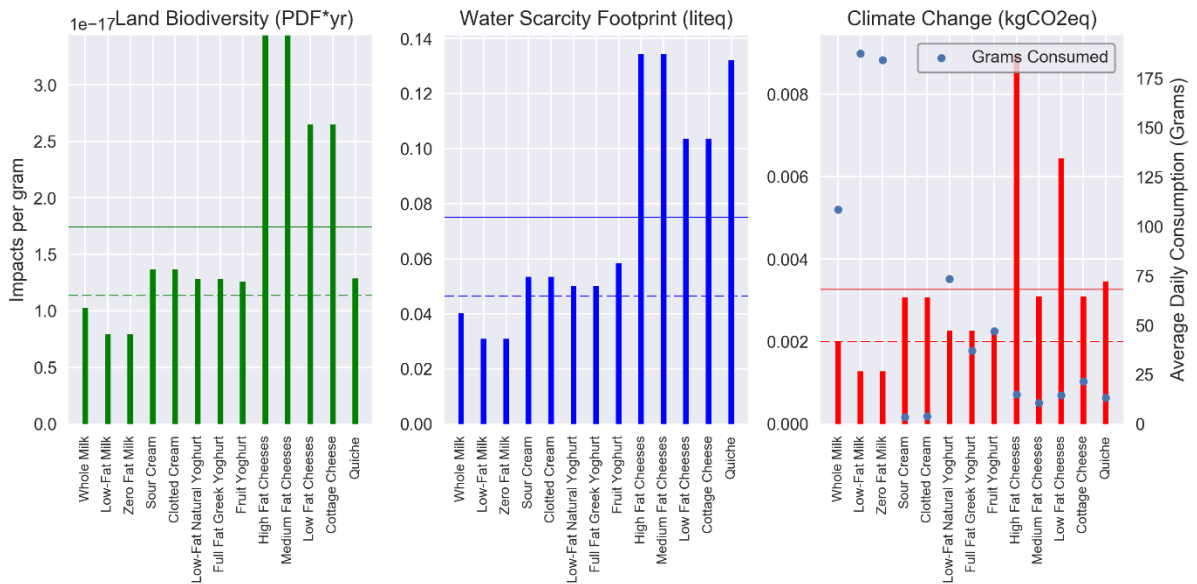

61  
 62 Fig. S6. Impacts per gram for each food/dish in the Dairy food group for each impact category. Blue  
 63 dots represent the average daily consumption (per person) of each food/dish. Dashed lines represent the  
 64 weighted average, and solid lines show the average regardless of consumption rates.

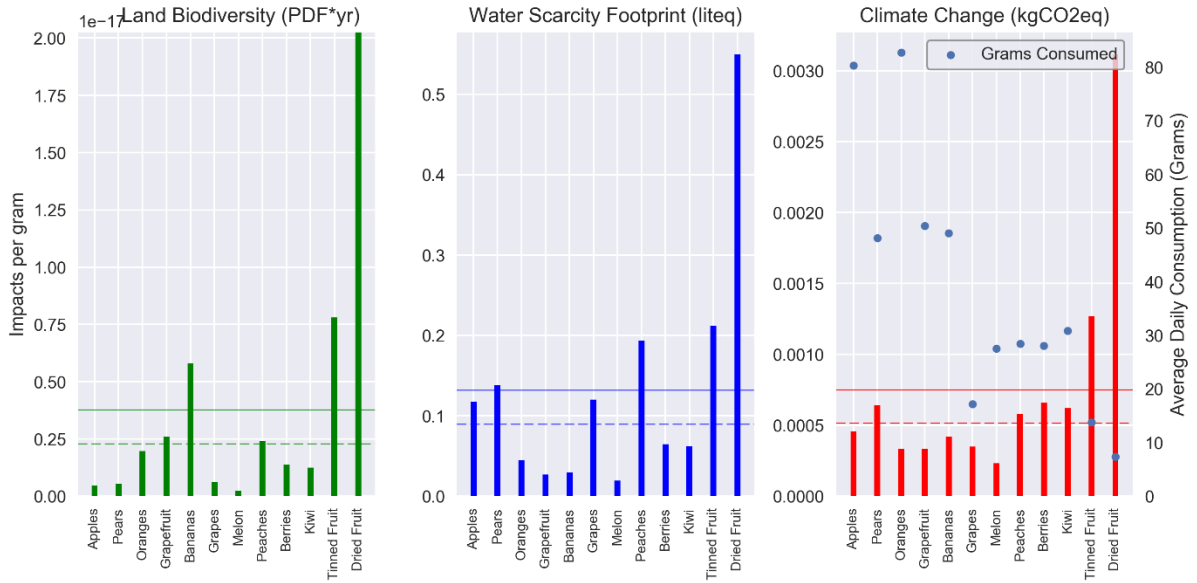

65  
66 Fig. S7. Impacts per gram for each food/dish in the Fruit food group for each impact category. Blue  
67 dots represent the average daily consumption (per person) of each food/dish. Dashed lines represent the  
68 weighted average, and solid lines show the average regardless of consumption rates.

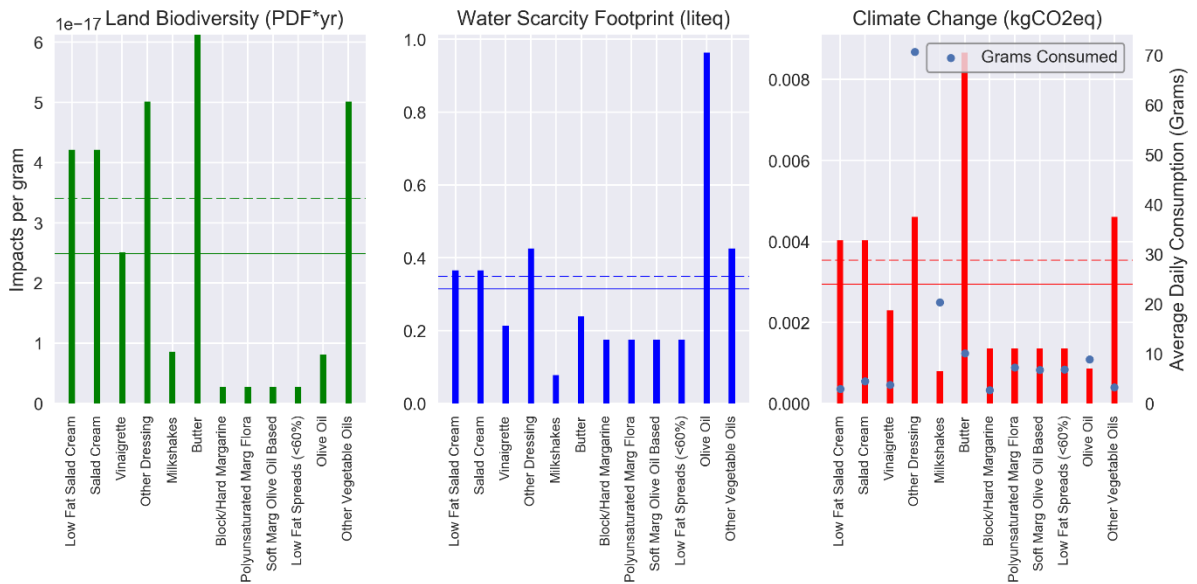

69  
70 Fig. S8. Impacts per gram for each food/dish in the Fats food group for each impact category. Blue  
71 dots represent the average daily consumption (per person) of each food/dish. Dashed lines represent the  
72 weighted average, and solid lines show the average regardless of consumption rates.



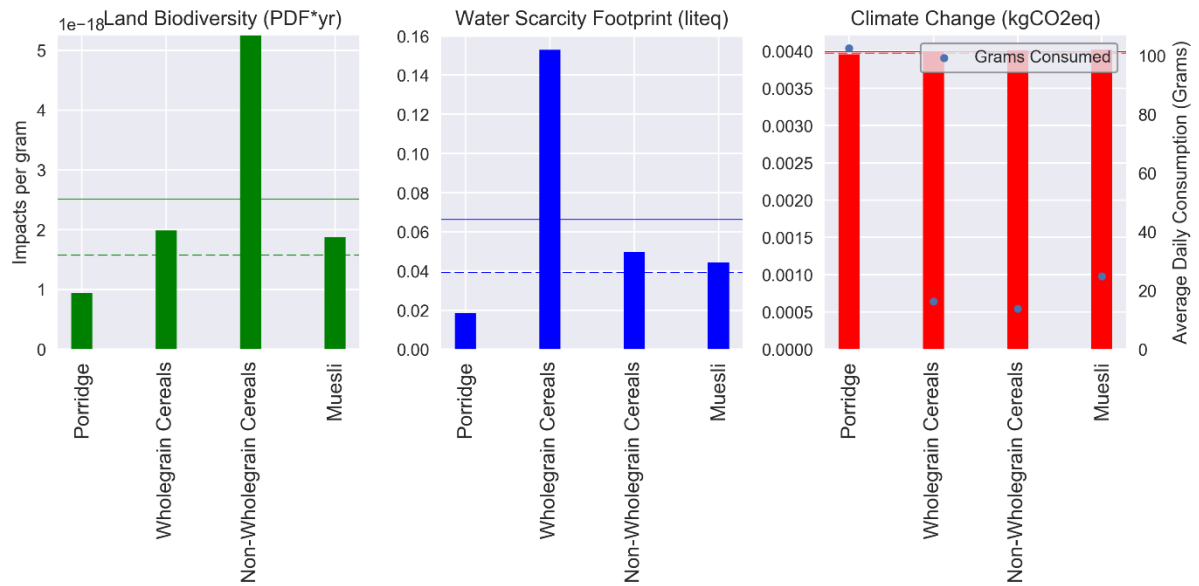

73  
 74 Fig. S9. Impacts per gram for each food/dish in Cereals food group for each impact category. Blue dots  
 75 represent the average daily consumption (per person) of each food/dish. Dashed lines represent the  
 76 weighted average, and solid lines show the average regardless of consumption rates.

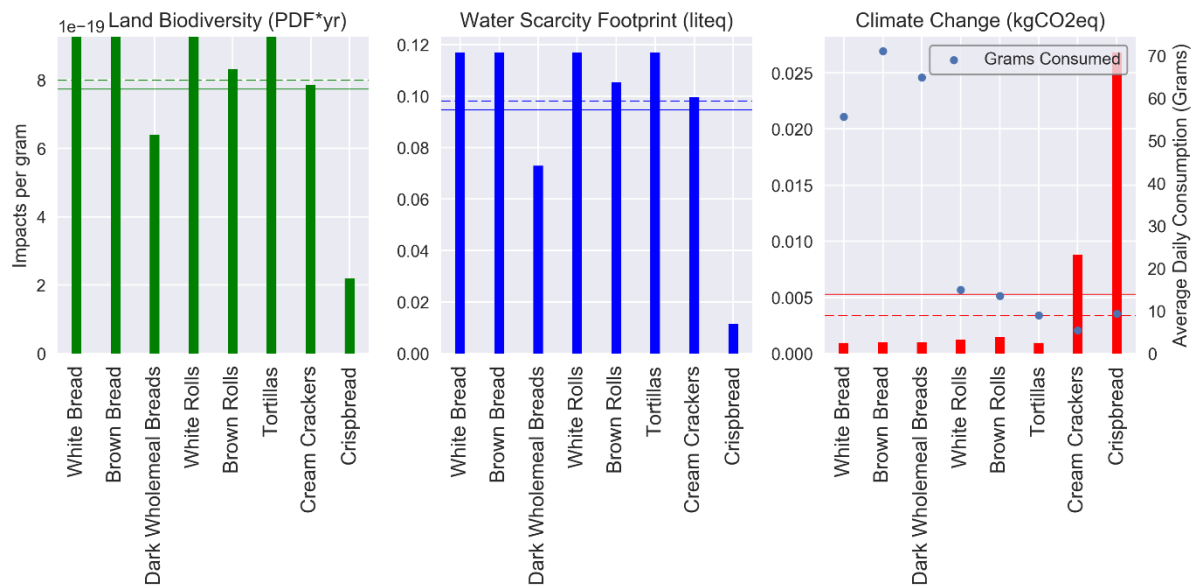

77  
 78 Fig. S10. Impacts per gram for each food/dish in Breads food group for each impact category. Blue dots  
 79 represent the average daily consumption (per person) of each food/dish. Dashed lines represent the  
 80 weighted average, and solid lines show the average regardless of consumption rates.

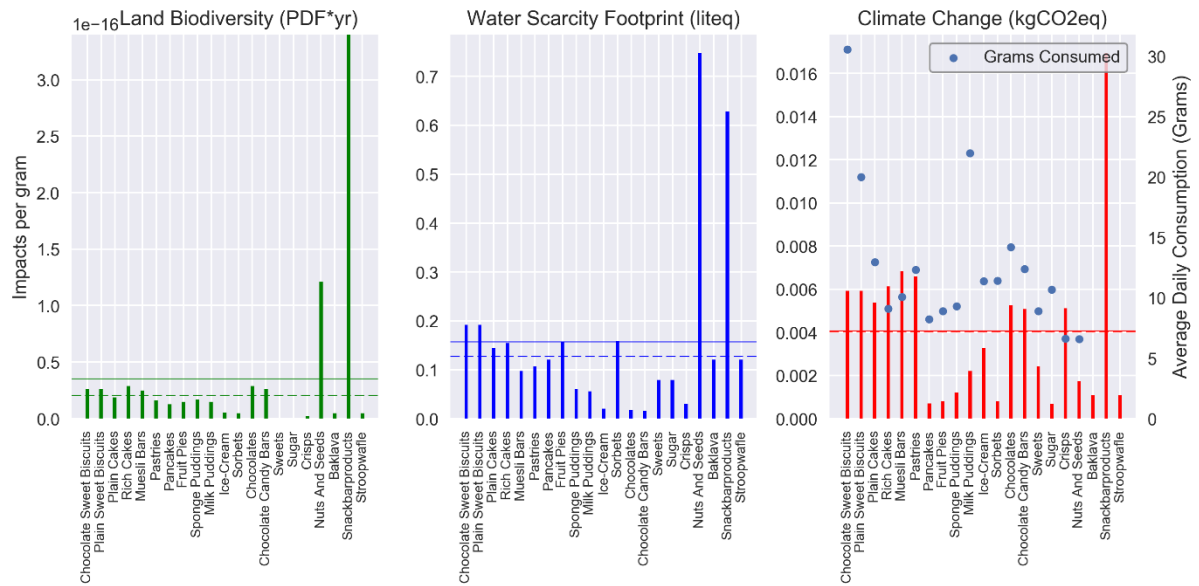

81  
 82 Fig. S11. Impacts per gram for each food/dish in Sweets food group for each impact category. Blue dots  
 83 represent the average daily consumption (per person) of each food/dish. Dashed lines represent the  
 84 weighted average, and solid lines show the average regardless of consumption rates.

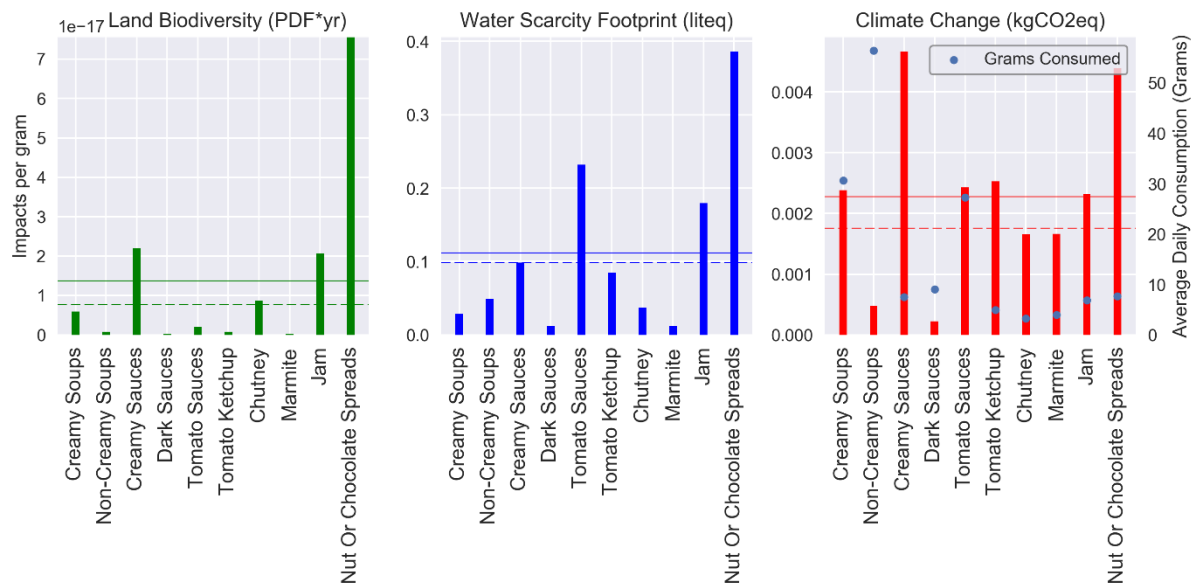

85  
 86 Fig. S12. Impacts per gram for each food/dish in Soups and Sauces food group for each impact category.  
 87 Blue dots represent the average daily consumption (per person) of each food/dish. Dashed lines  
 88 represent the weighted average, and solid lines show the average regardless of consumption rates.

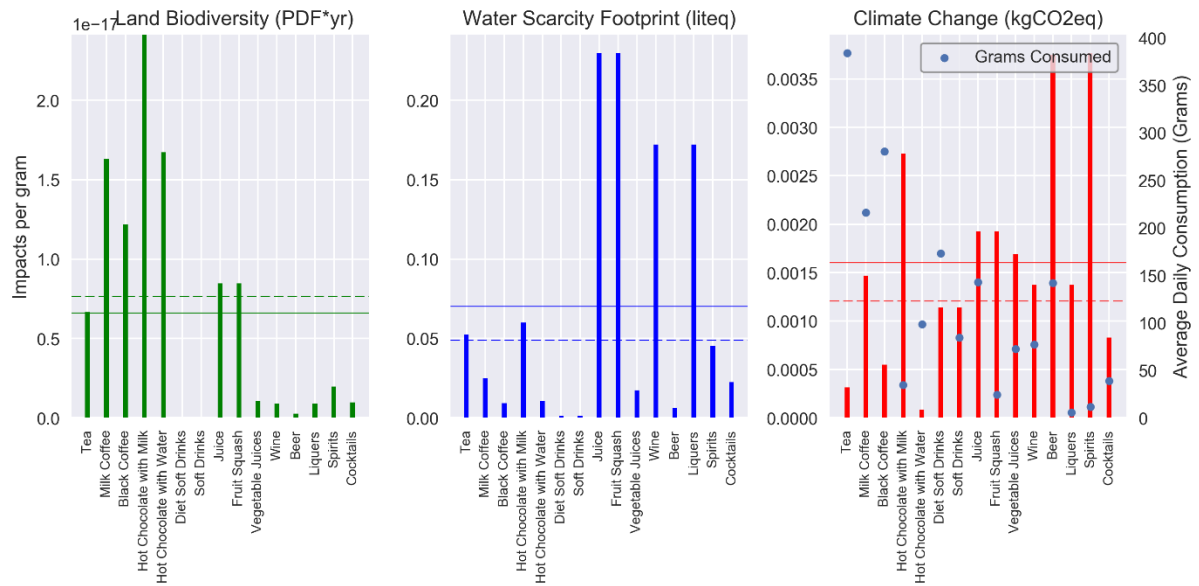

89  
 90 Fig. S13. Impacts per gram for each food/dish in Drinks food group for each impact category. Blue dots  
 91 represent the average daily consumption (per person) of each food/dish. Dashed lines represent the  
 92 weighted average, and solid lines show the average regardless of consumption rates.  
 93 S3. Supplementary Determination of Recommended Diets Results

94 We investigated what type of eating patterns (Fig 14) were associated with both good and poor  
 95 quality diets (and the impacts associated with these diets (Table S1)), the eating patterns for low and  
 96 high impact diets in each impact category, and the eating patterns that fell at the intersection of low  
 97 impact and good quality diets.

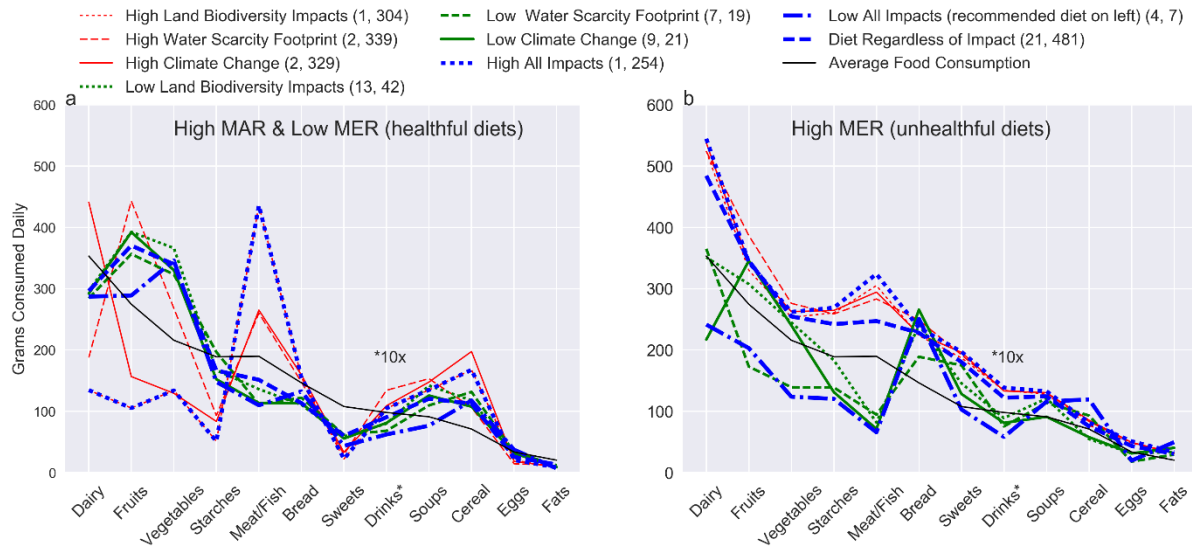

98

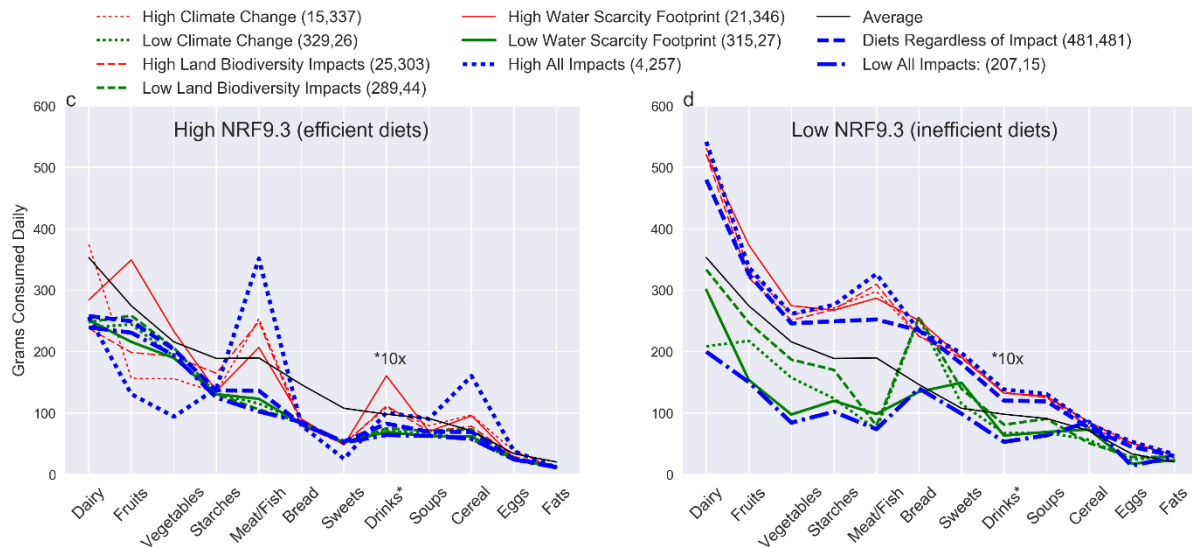

99

100 Figure S14a-d. Comparison of eating patterns between individuals, regardless of gender or country,  
 101 falling in the top and bottom third for all impacts ( $\geq 6.5$  and  $\leq 4.8$  kgCO<sub>2</sub>eq,  $\geq 286$  and  $\leq 217$  lit eq, and  
 102  $\geq 5.14E-14$  and  $\leq 3.57E-14$  PDF\*yr, respectively), MAR shown in a-b ( $\geq 0.99$  and  $\leq 0.95$ , respectively),  
 103 MER shown in a-b ( $\geq 1.6$  and  $\leq 1.2$ , respectively) and c-d shows NRF9.3 ( $\geq 0.23$  and  $\leq 0.15$ ,  
 104 respectively) for each of the food groups. Numbers in parentheses indicate the number of participants  
 105 (out of 1457) that fall in this category for the left or right graph, respectively. The drinks category  
 106 includes the water content of the evaluated beverages. \*To improve visualization of the graphs, the  
 107 grams of drinks consumed was divided by 10.

108 Table S3. Recommended percent changes in typical subset eating patterns to achieve a diet that is both high quality (as quantified by high MAR, low MER,  
 109 and high NRF9.3) and low impacts (as quantified by low climate change, low biodiversity loss, and low water scarcity footprint). Green shading represents  
 110 that increases in the food group consumption are required, red shading represents that decreases in the food group consumption are required.

|                | Bread and Savory Biscuits | Cereal | Drinks | Dairy | Eggs  | Fats and Spreads | Fruits | Meat and Fish | Potatoes, Rice, and Pasta | Soups, Sauces, and Spreads | Sweets | Vegetables |
|----------------|---------------------------|--------|--------|-------|-------|------------------|--------|---------------|---------------------------|----------------------------|--------|------------|
| German Male    | -15.9                     | 117.5  | -44.6  | -6.4  | 49.2  | -71.8            | 5.8    | -36.0         | -31.8                     | 6.6                        | -55.2  | 90.0       |
| German Female  | 7.0                       | 203.8  | -40.9  | -17.3 | 57.4  | -67.5            | -4.5   | -9.7          | -17.6                     | -1.8                       | -57.7  | 65.6       |
| Greek Male     | 10.6                      | 71.8   | -10.2  | 2.0   | 13.6  | -63.6            | 34.1   | -45.1         | -22.0                     | 62.8                       | -52.0  | 80.7       |
| Greek Female   | 23.4                      | 132.3  | -2.6   | 14.8  | 66.0  | -66.1            | 20.8   | -31.5         | -1.7                      | 58.3                       | -51.9  | 61.4       |
| Irish Male     | -18.6                     | 12.4   | -44.4  | -11.6 | -31.3 | -74.1            | 10.5   | -51.2         | -36.2                     | -22.4                      | -69.1  | 75.2       |
| Irish Female   | 29.5                      | -3.4   | -30.8  | -17.2 | 1.0   | -62.9            | -15.8  | -39.1         | -22.2                     | -31.8                      | -66.7  | 29.4       |
| Dutch Male     | -47.4                     | 31.0   | -52.8  | -31.4 | -2.4  | -70.9            | -1.2   | -44.1         | -31.2                     | -21.2                      | -55.7  | 66.4       |
| Dutch Female   | -32.4                     | 100.4  | -49.3  | -17.0 | 81.4  | -65.5            | -1.0   | -18.8         | -9.2                      | -25.8                      | -50.2  | 69.6       |
| Polish Male    | -40.5                     | 135.6  | -38.5  | -42.0 | -13.4 | -75.8            | 45.8   | -55.4         | -33.1                     | -40.6                      | -65.2  | 107.4      |
| Polish Female  | -13.1                     | 104.5  | -32.2  | -16.4 | 26.7  | -64.1            | 19.3   | -29.7         | -11.3                     | -34.8                      | -59.7  | 77.5       |
| Spanish Male   | -19.7                     | 208.5  | -32.0  | -29.8 | -5.5  | -57.6            | 11.7   | -66.0         | -28.8                     | -12.3                      | -63.4  | 49.0       |
| Spanish Female | 11.1                      | 157.9  | -15.7  | -30.8 | 7.7   | -66.3            | -10.1  | -52.9         | 4.0                       | -7.7                       | -54.7  | 61.0       |
| UK Male        | 16.4                      | 7.4    | -44.5  | -24.2 | -30.9 | -55.8            | -5.0   | -48.0         | -40.5                     | -33.2                      | -66.9  | 30.8       |
| UK Female      | 32.1                      | 48.4   | -41.0  | -18.8 | 6.4   | -56.2            | 7.8    | -33.2         | -20.8                     | -19.3                      | -59.8  | 38.9       |
| Vegetarian     | 5.0                       | 28.4   | -30.0  | -6.9  | -0.1  | -55.8            | -16.3  |               | -13.5                     | -3.0                       | -51.6  | -0.3       |
| No Red Meat    | 12.5                      | 2.2    | -38.9  | -15.8 | -4.6  | -63.5            | -20.9  | 50.4          | -12.4                     | -15.6                      | -51.2  | 8.1        |
| No Dairy       | -6.9                      | 42.7   | 15.9   | 183.2 | -75.0 | 16.0             | -32.9  | -45.3         | -30.3                     | -55.5                      | -31.3  | 10.9       |
| Male           | -23.4                     | 55.5   | -40.7  | -22.3 | -6.2  | -68.5            | 11.1   | -51.4         | -31.8                     | -14.6                      | -61.4  | 67.7       |
| Female         | 3.7                       | 72.6   | -33.2  | -16.0 | 27.3  | -64.2            | 1.4    | -33.1         | -12.6                     | -16.8                      | -58.2  | 55.3       |
| Total Average  | -9.5                      | 65.4   | -36.5  | -18.7 | 10.9  | -66.1            | 5.2    | -42.1         | -21.7                     | -15.9                      | -59.6  | 60.2       |

111

112 S4. Supplementary Comparison of energy intakes:

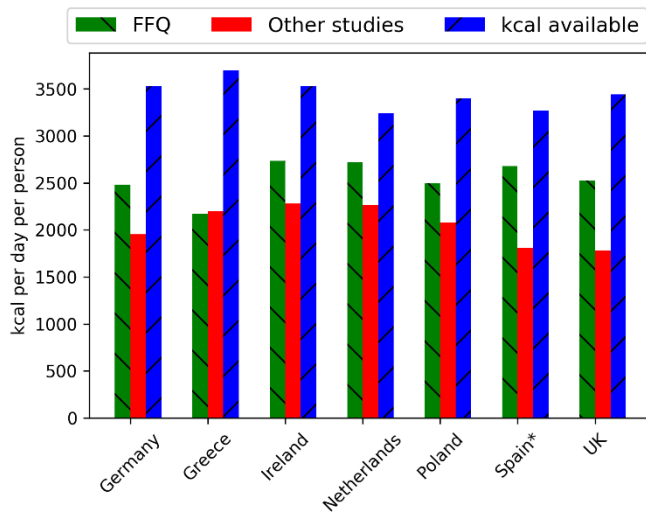

113 Figure S15. Daily energy intake (as kcal) using other nutrition studies and available kcal statistics. Other  
 114 nutrition study's data available from (1)(2)(3)(4)(5)\*(6), from left to right. Available kcal taken from  
 115 FAO kcal availability per country (7). \*indicates that under-reporters in this study were not removed,  
 116 thereby lowering the average energy intake.  
 117

118 S5. Supplementary Scenario Analysis for Different Food Production Methods

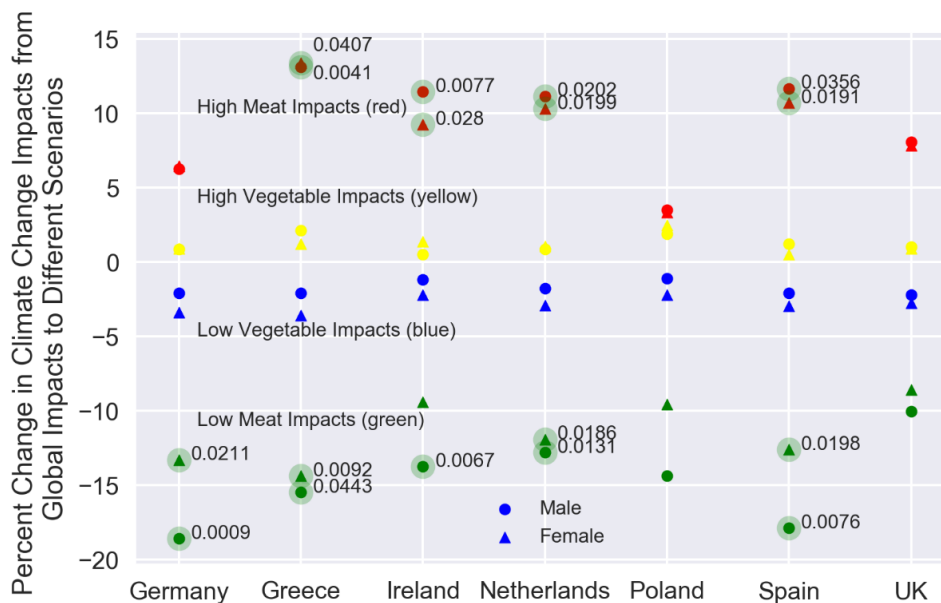

119 Figure S16. Percent changes in climate change impacts from global values when considering four  
 120 different food choice scenarios. Significance from the new impact to the original, global impact is  
 121 marked by a transparent green dot and p-values are printed next to the dot. Points with no transparent  
 122 dot indicate that there was not a significant change in impacts from the global impact value scenario.  
 123 Statistical significance between the different scenarios was verified using an unpaired two sided t-test  
 124 under the assumption that p-values lower than 0.05 indicated statistically significant differences between  
 125 the means of subsets.  
 126

127 S6. Supplementary Material for Data Sources, Nutrition, and Environmental Indicators

128 *Food Consumption Data*

129 Food consumption data was derived from the Food4Me study (8) taking place between 2012  
 130 and 2014. Food consumption was measured through the use of an online food frequency questionnaire  
 131 (FFQ). The previous month's habitual food consumption was assessed by collected data on consumption  
 132 frequency and portion size for various food and drink items (9)(10). The FFQ contained 162 food items  
 133 (both single items and composite dishes), aggregated into 12 food groups, from which participants could  
 134 choose. The study included over 1'400 men and women from seven European countries (Germany,  
 135 Greece, Ireland, Netherlands, Spain, Poland, and the UK) between the ages of 18 and 79, with full details  
 136 regarding age, gender, weight, health, physical activity levels, and reasons for participating in the study,  
 137 published elsewhere (11). As the Food4Me study was intended to alter an individual's eating patterns  
 138 based on personalized diet and nutrition advice, food consumption data from the baseline month, prior  
 139 to recommendations for changing one's diet, was used.

140 *Diet Quality Indicator*

141 Daily nutrient intake values were based on the European Food Safety Authority's (EFSA)  
 142 adequate intake (AI) dietary reference values (shown in Table S4) (12). AI values are based on  
 143 experimental data and are the recommended average daily nutrient intake level to meet or exceed the  
 144 needs of most healthy individuals (13). Because the population subset studied here is located in various  
 145 countries throughout Europe, the AI values from EFSA (and not from an individual country) were used  
 146 in calculating the nutrition indicators. However, gender and age specific RDA values published by the  
 147 US National Institute of Medicine (13) were also considered. The sensitivities of the rate of consuming  
 148 less than the recommended intake to the choice of dietary reference value (AI or RDA) is included in  
 149 the supporting information (Table S5).

150 Table S4. Dietary Reference Values

| NUTRIENT                    |                       | Recommended Daily Allowance (RDA) (13) |                                | Adequate Intake (AI) (12) |       | Global Burden of Disease    |
|-----------------------------|-----------------------|----------------------------------------|--------------------------------|---------------------------|-------|-----------------------------|
|                             |                       | MEN                                    | WOMEN                          | MEN                       | WOMEN | Contribution to total DALYs |
| <b>Beneficial Nutrients</b> |                       |                                        |                                |                           |       |                             |
| 1                           | Protein (g/day)       | 56                                     | 46                             | 56                        | 47    | 0.04%**                     |
| 2                           | Dietary Fiber (g/day) | 38 (19-50)*<br>30 (51-70)*             | 25 (19-50)*<br>21 (51-70)*     | 25                        | 25    | 0.56%**                     |
| 3                           | Vitamin A (ug/day)    | 900                                    | 700                            | 750                       | 650   |                             |
| 4                           | Vitamin C (mg/day)    | 90                                     | 75                             | 45                        | 45    |                             |
| 5                           | Vitamin E (mg/day)    | 15                                     | 15                             | 13                        | 11    |                             |
| 6                           | Calcium (mg/day)      | 1000                                   | 1000 (19-50)*<br>1200 (51-70)* | 700                       | 700   | 0.29%**                     |
| 7                           | Iron (mg/day)         | 8                                      | 18 (19-50)*<br>8 (51-70)*      | 11                        | 16    | 1.13%**                     |
| 8                           | Magnesium (mg/day)    | 400 (19-30)*<br>420 (31-70)*           | 310 (19-30)*<br>320 (31-70)*   | 350                       | 300   |                             |
| 9                           | Potassium (mg/day)    | 4700                                   | 4700                           | 3100                      | 3100  |                             |
| 10                          | Thiamin (mg/day)      | 1.2                                    | 1.1                            | 1.1                       | 0.9   |                             |
| 11                          | Riboflavin (mg/day)   | 1.3                                    | 1.1                            | 1.6                       | 1.3   |                             |
| 12                          | Niacin (mg/day)       | 16                                     | 14                             | 18                        | 14    |                             |
| 13                          | Vitamin B6 (mg/day)   | 1.3 (19-50)*<br>1.7 (51-70)*           | 1.3 (19-50)*<br>1.5 (51-70)*   | 1.7                       | 1.6   |                             |
| 14                          | Folate (ug/day)       | 400                                    | 400                            | 330                       | 330   |                             |
| 15                          | Vit B12 (ug/day)      | 2.4                                    | 2.4                            | 4                         | 4     |                             |
| 16                          | Zinc (mg/day)         | 11                                     | 8                              | 9.5                       | 7     |                             |
| 17                          | Copper (mg/day)       | 0.9                                    | 0.9                            | 1.1                       | 1.1   |                             |
| 18                          | Iodine (ug/day)       | 150                                    | 150                            | 130                       | 130   | 0.09%**                     |
| 19                          | Selenium (ug/day)     | 55                                     | 55                             | 55                        | 55    |                             |

| Nutrients to Limit |                                                  |                                                 |                                                 |          |  |
|--------------------|--------------------------------------------------|-------------------------------------------------|-------------------------------------------------|----------|--|
|                    |                                                  | Men                                             | Women                                           |          |  |
| 20                 | Saturated Fat (g/day)(14)<br>10% of total energy | 26.7 (19-30)*<br>24.4 (31-50)*<br>22.2 (51-70)* | 22.2 (19-30)*<br>20.0 (31-50)*<br>17.8 (51-70)* | 1.58%*** |  |
| 21                 | Sugars (g/day) (14)<br>25% of total energy       | 150 (19-30)*<br>137.5 (31-50)*<br>125 (51-70)*  | 125 (19-30)*<br>112.5 (31-50)*<br>100 (51-70)*  |          |  |
| 22                 | Sodium (mg/day) (15)                             | 2300                                            | 2300                                            |          |  |

\* values in parentheses indicate the age range for a given intake  
\*\* DALYs associated with dietary risk for under consumed protein, fiber, calcium, iron, and iodine or overconsumed sodium, respectively, for western Europe for 2015.  
\*\*\* includes DALYs due to high intake of processed meats, trans fat, red meat, and sugar sweetened beverages.

151 Table S5. Comparison of the number of people under-consuming a specific nutrient under the Adequate  
152 Intake value versus the Recommended Dietary Allowance

|               | Adequate Intake (European Food Safety Authority's (EFSA) |                                                           | Recommended Dietary Allowance values published by the US National Institute of Medicine |                                                           |
|---------------|----------------------------------------------------------|-----------------------------------------------------------|-----------------------------------------------------------------------------------------|-----------------------------------------------------------|
|               | Average MAR                                              | Number of People under-consuming a nutrient (out of 1457) | Average MAR                                                                             | Number of People under-consuming a nutrient (out of 1457) |
| Protein       | 1.45                                                     | 312                                                       | 2.11                                                                                    | 54                                                        |
| Vitamin A     | 3.0                                                      | 81                                                        | 2.02                                                                                    | 257                                                       |
| Thiamin       | 1.05                                                     | 1096                                                      | 2.27                                                                                    | 111                                                       |
| Riboflavin    | 1.98                                                     | 118                                                       | 1.98                                                                                    | 118                                                       |
| Niacin        | 2.09                                                     | 77                                                        | 1.77                                                                                    | 157                                                       |
| Vitamin B6    | 1.92                                                     | 85                                                        | 1.95                                                                                    | 90                                                        |
| Folate        | 1.48                                                     | 312                                                       | 0.92                                                                                    | 977                                                       |
| Vitamin B12   | 2.01                                                     | 226                                                       | 3.36                                                                                    | 50                                                        |
| Vitamin C     | 5.48                                                     | 9                                                         | 2.04                                                                                    | 277                                                       |
| Vitamin E     | 0.98                                                     | 900                                                       | 0.77                                                                                    | 1169                                                      |
| Calcium       | 2.27                                                     | 70                                                        | 1.2                                                                                     | 593                                                       |
| Potassium     | 1.16                                                     | 587                                                       | 0.87                                                                                    | 1043                                                      |
| Iron          | 1.20                                                     | 671                                                       | 1.52                                                                                    | 553                                                       |
| Magnesium     | 1.2                                                      | 547                                                       | 1.1                                                                                     | 714                                                       |
| Zinc          | 1.95                                                     | 77                                                        | 1.3                                                                                     | 436                                                       |
| Copper        | 1.2                                                      | 614                                                       | 1.88                                                                                    | 135                                                       |
| Iodine        | 1.86                                                     | 211                                                       | 1.24                                                                                    | 585                                                       |
| Selenium      | 1.57                                                     | 306                                                       | 1.14                                                                                    | 684                                                       |
| Dietary Fiber | 1.18                                                     | 641                                                       | 1.07                                                                                    | 806                                                       |

153 The diet quality of an individual was measured using two absolute indicators and one efficiency  
154 indicator. The first absolute indicator, Mean Adequacy Ratio (MAR), has been developed as a measure  
155 of adequate nutrient consumption (16). This value correlates with nutrient deficiencies, and is calculated  
156 through the following equations:

157 
$$NR_{en,i} = \frac{intake_{en,i}}{AI_{en,i}}, NR_{en,i} = \{0 \dots 1\}$$

158 
$$MAR = \frac{1}{19} * \sum_{i=1}^{19} NR_{en,i}$$

159 where the nutrient ratio (NR) is the ratio of the intake<sub>en</sub> (the daily consumed mass of a specific  
160 encouraged nutrient (en)) to the AI<sub>en</sub>. Nutrients 1 through 19 in Table S4 were considered in this



161 calculation. The NR for each nutrient  $i$  was capped at one to avoid that overconsumption of one nutrient  
 162 compensate for under supply of others in an individual's average MAR value. In Vieux's study (17),  
 163 Vitamin D was also included as a nutrient in the calculation, however because it is also synthesized by  
 164 the body upon skin exposure to sunlight, we have decided it should not be included in the calculation  
 165 for a diet based indicator.

166 Because MAR does not capture consumption of nutrients that should be consumed in limited  
 167 quantities, the Mean Excess Ratio (MER), as developed by (17) was also calculated for each individual  
 168 using the equation below. Limiting nutrients ( $ln$ ) considered in the MER calculation, as well as their  
 169 maximum recommended values ( $MRV_{ln}$ ), are shown as items 20 through 22 in Table S4. In the case of  
 170 the MER calculation, NRs not reaching one were adjusted to one to avoid compensating for a higher  
 171 intake of the other limiting nutrients.

$$172 \quad NR_{ln,j} = \frac{intake_{ln,j}}{MRV_{ln,j}}, NR_{ln,j} = \{1 \dots inf\}$$

$$173 \quad MER = \frac{1}{3} * \sum_{j=1}^3 NR_{ln,j}$$

174 MRV limits for saturated fats were set to 10% of the total required daily energy consumption and for  
 175 sugars were set to 25% of an individual's total required daily energy consumption (14). Sodium MRV  
 176 was set to 2.3g per day (15)(14).

177 The Nutrient Rich Food Index 9.3 (NRF9.3) was used as an efficiency indicator to measure the  
 178 nutritional quality of each diet and includes the combination of both beneficial and harmful nutrients as  
 179 well as energy intake. It was found that NRF9.3 was a good indicator for identifying poor quality diets,  
 180 as it correlated well with MER, but was not a good indicator to identify people who consumed less than  
 181 recommended levels of beneficial nutrients. This was developed as a method of ranking the nutritional  
 182 quality of foods and was found to be highly correlated to diet quality as measured through the Healthy  
 183 Eating Index (HEI) (18). The nutrients included in the NRF9.3 were chosen by (18) because they showed  
 184 the best correlation to the HEI when compared to other sets of nutrient combinations. For this indicator,  
 185 the NR was set to a maximum of one for encouraged nutrients and set to a minimum of one for limiting  
 186 nutrients, as in the MAR and MER calculations. Because the NRF value is not an average as the MAR  
 187 and MER, it will change depending on the number of nutrients considered in the calculation and is  
 188 relative to calorie intake. This indicator utilizes nine encouraged nutrients (Table S4 items 1 to 9) and  
 189 three nutrients to limit (Table S4 items 20 through 22). The NRF9.3 was calculated using the following  
 190 equation:

$$191 \quad NRF9.3 = \frac{\sum_{i=1}^9 NR_{en,i} - \sum_{j=1}^3 NR_{ln,j}}{daily \text{ kcal intake}}$$

## 192 *Estimation of Diet-Related Environmental Impacts*

193 Impact values per gram of food were calculated for each of the 162 foods/dishes on the FFQ.  
 194 Composite foods were broken down into their three main ingredients by mass using a generic recipe or  
 195 product label. Impacts were calculated for the mass of each ingredient and summed for a total impact  
 196 per gram of each composite food. In many cases, impacts were available per crop type or ingredient  
 197 (e.g. tomatoes) but not for a product (e.g. ketchup) derived from that crop. In this case, the impact  
 198 associated with the root product (tomatoes) was determined and conversion factors, as provided in (19)  
 199 were used to calculate the impact of the derived product. When impacts for derived products were  
 200 available in databases or literature, these values were used in place of root products and conversion  
 201 factors. A table showing the foods/dishes, their three main ingredients, conversion factors, associated  
 202 processing energy and references (included only for climate change), and any assumptions is included  
 203 in the Supplementary Electronic Table online.

204 The impact of each gram of food was calculated for climate change, WFP, and land-use driven  
205 biodiversity loss as follows: climate change impacts, measured as kg CO<sub>2</sub> equivalents (kgCO<sub>2</sub>eq) per  
206 gram of food, were calculated using a combination of the Ecoinvent 3.3 database (20), the ZHAW  
207 database (21), and the AGRIBALYSE v1.2 database ([www.ademe.fr](http://www.ademe.fr)) using IPCC GWP 2013 100 years  
208 characterization factors (22) with Brightway (23). The WFP, measured as liters equivalent (lit<sub>eq</sub>) per  
209 gram of food, was calculated by multiplying a monthly, regional water stress index (24) with crop  
210 specific irrigation requirements to determine the global production-weighted water footprint per crop.  
211 Land-use driven biodiversity impacts were measured as global potentially disappeared fractions  
212 (PDF)\*years per gram of food based on the crop specific, taxa aggregated impacts as defined in (25). In  
213 both the WFP and the biodiversity assessments, global weighted production averages were used,  
214 regardless of the country of consumption, to allow for an assessment of the impact due to varying diets  
215 and not to the changes in the supply chain.

216 WFP and land-use biodiversity loss impacts associated with livestock products (beef, chicken,  
217 milk, eggs, pig, sheep, and fish) were calculated based on the cultivation of animal feed required per  
218 gram of product using a combination of farming systems (global averages of extensive, intensive, or  
219 mixed production systems) for the specific livestock product. The fraction of concentrate feed  
220 (consisting of maize, wheat, barley, and soymeal) and the feed conversion efficiencies (using global  
221 values) were obtained from (26), with remaining feed assumed to be roughage and modeled as grass.  
222 The fraction of concentrate feed (consisting of maize, wheat, barley, and soymeal) and the feed  
223 conversion efficiencies (using global values) were obtained from (26), with remaining feed assumed to  
224 be forage with half modeled as harvested grass (25) and the other half modeled as pasture using the  
225 global characterization factor for pasture (27), the total available grassland (28), and a production rate  
226 of 1 kg/ha/yr. The ratios of the concentrate feed crops were modeled as specified per animal type as  
227 presented in (29). Biodiversity impacts due to fishing were not considered due to a lack of life cycle  
228 impact assessment methodology for aquatic biodiversity loss, therefore these impacts will be  
229 underestimated.

230 For each indicator, each individual's impacts were calculated by multiplying the impacts per  
231 gram of food/dish by the reported daily grams of the food consumed by that person. Details of the  
232 impacts for one gram of each food/dish type, the average daily grams consumed for each food/dish type,  
233 and the consumption weighted and unweighted average impacts for each of the food groups (eggs were  
234 excluded) are included in Figures S3 through S13. An environmental impact efficiency indicator,  
235 calculated as the ratio of impacts to energy intake, was also determined for each individual. This  
236 indicator shows the impacts associated with an individual's kcal consumption, regardless of the nutrients  
237 consumed, and can show whether primarily high impact or low impacts foods are consumed in relation  
238 to their energy intake.

## 239 REFERENCES:

- 240 1. Heuer T, Krebs C, Moon K, Brombach C, Hoffmann I (2015) Food consumption of adults in  
241 Germany: results of the German National Nutrition Survey II based on diet history interviews.  
242 *Br J Nutr* 113(10):1603–1614.
- 243 2. Psaltopoulou T, et al. (2004) Olive oil, the Mediterranean diet, and arterial blood pressure: the  
244 Greek European Prospective Investigation into Cancer and Nutrition (EPIC) study. *Am J Clin*  
245 *Nutr* 80(0002–9165 (Print)):1012–1018.
- 246 3. Harrington J, et al. (2008) *SLÁN 2007: Survey of Lifestyle, Attitudes and Nutrition in Ireland.*  
247 *Dietary Habits of the Irish Population* (Dublin) Available at:  
248 <http://epubs.rcsi.ie/cgi/viewcontent.cgi?article=1005&context=psycholrep>.
- 249 4. TM van Rossum C, Fransen HP, Verkaik-Kloosterman J, JM Buurma-Rethans E, Ocké MC  
250 (2011) *Dutch National Food Consumption Survey, Diet of children and adults 7 to 69 years*  
251 Available at: [http://www.rivm.nl/en/Topics/D/Dutch\\_National\\_Food\\_Consumption\\_Survey](http://www.rivm.nl/en/Topics/D/Dutch_National_Food_Consumption_Survey).
- 252 5. Elmadfa I, et al. (2009) *European Nutrition and Health Report 2009*. doi:10.1159/000242365.

- 253 6. Whitton C, et al. (2011) National Diet and Nutrition Survey: UK food consumption and  
254 nutrient intakes from the first year of the rolling programme and comparisons with previous  
255 surveys. *Br J Nutr* 106(12):1899–1914.
- 256 7. ChartsBin statistics collector team 2011 (2011) Daily Calorie Intake Per Capita.  
257 *ChartsBin.com*. Available at: <http://chartsbin.com/view/1150> [Accessed October 17, 2016].
- 258 8. Celis-Morales C, et al. (2015) How reliable is internet-based self-reported identity, socio-  
259 demographic and obesity measures in European adults? *Genes Nutr* 10(5):28.
- 260 9. Forster H, Fallaize R, Gallagher C, et.al. (2014) Online dietary intake estimation: the Food4Me  
261 food frequency questionnaire. *J Med Internet Res* 16(6):e150.
- 262 10. Fallaize R, et al. (2014) Online Dietary Intake Estimation: Reproducibility and Validity of the  
263 Food4Me Food Frequency Questionnaire Against a 4-Day Weighed Food Record. *J Med*  
264 *Internet Res* 16(8):1–20.
- 265 11. Livingstone KM, Celis-Morales C, Navas-Carretero S, et.al. (2016) Profile of European adults  
266 interested in internet-based personalised nutrition: the Food4Me study. *Eur J Nutr* 55(2):759–  
267 769.
- 268 12. European Food Safety Authority (2010) European Food Safety Authority Dietary Reference  
269 Values and Dietary Guidelines. Available at:  
270 <https://www.efsa.europa.eu/en/topics/topic/dietary-reference-values-and-dietary-guidelines>  
271 [Accessed November 1, 2016].
- 272 13. Otten JJ, Hellwig JP, Linda D (2006) *DRI, dietary reference intakes: the essential guide to*  
273 *nutrient requirements* (National Academies Press, Washington, D.C.).
- 274 14. U.S. Department of Health and Human Services and U.S. Department of Agriculture (2016)  
275 2015 – 2020 Dietary Guidelines for Americans. *8th Ed*.
- 276 15. Havas S, Roccella EJ, Lenfant C (2004) Reducing the Public Health Burden from Elevated  
277 Blood Pressure Levels in the United States by Lowering Intake of Dietary Sodium. *Am J Public*  
278 *Health* 94(1):19–22.
- 279 16. Tabacchi G, et al. (2009) How is the adequacy of micronutrient intake assessed across Europe?  
280 A systematic literature review. *Br J Nutr* 101(S2):S29–36.
- 281 17. Vieux F, Soler L-G, Touazi D, Darmon N (2013) High nutritional quality is not associated with  
282 low greenhouse gas emissions in self-selected diets of French adults. *Am J Clin Nutr*  
283 97(9):569–583.
- 284 18. Fulgoni VL, Keast DR, Drewnowski A (2009) Development and validation of the nutrient-rich  
285 foods index: a tool to measure nutritional quality of foods. *J Nutr* 139(8):1549–1554.
- 286 19. Scherer L, Pfister S (2016) Global Biodiversity Loss by Freshwater Consumption and  
287 Eutrophication from Swiss Food Consumption. *Environ Sci Technol* 50(13):7019–7028.
- 288 20. Wernet G, et al. (2016) The ecoinvent database version 3 (part I): overview and methodology.  
289 *Int J Life Cycle Assess* 21(9):1218–1230.
- 290 21. Eymann L, Kreuzer S, Stucki M, Scharfy D (2014) Ökobilanz von Milch und Milchprodukten.  
291 *ZHAW Zürcher Hochschule für Angew Wissenschaften, IUNR Inst für Umwelt und Natürliche*  
292 *Ressourcen, Grüental, Postfach CH-8820 Wädenswil*.
- 293 22. IPCC (2013) Climate Change 2013: The Physical Science Basis. Contribution of Working  
294 Group I to the Fifth Assessment Report of the Intergovernmental Panel on Climate Change.  
295 *Intergov Panel Clim Chang Work Gr I Contrib to IPCC Fifth Assess Rep (AR5)(Cambridge*  
296 *Univ Press New York):1535*.
- 297 23. Mutel CL (2017) *Brightway: An open source framework for Life Cycle Assessment* Available

- 298 at: <https://doi.org/10.21105%2Fjoss.00236>.
- 299 24. Pfister S, Bayer P (2014) Monthly water stress: spatially and temporally explicit consumptive  
300 water footprint of global crop production. *J Clean Prod* 73:52–62.
- 301 25. Chaudhary A, Pfister S, Hellweg S (2016) Spatially Explicit Analysis of Biodiversity Loss Due  
302 to Global Agriculture, Pasture and Forest Land Use from a Producer and Consumer  
303 Perspective. *Environ Sci Technol* 50(7):3928–3936.
- 304 26. Mekonnen MM, Hoekstra AY (2012) A Global Assessment of the Water Footprint of Farm  
305 Animal Products. *Ecosystems* 15(3):401–415.
- 306 27. United Nations Environment Programme (2016) *Global Guidance for Life Cycle Impact*  
307 *Assessment Indicators* Available at: [http://www.lifecycleinitiative.org/training-](http://www.lifecycleinitiative.org/training-resources/global-guidance-lcia-indicators-v-1/)  
308 [resources/global-guidance-lcia-indicators-v-1/](http://www.lifecycleinitiative.org/training-resources/global-guidance-lcia-indicators-v-1/).
- 309 28. Food and Agriculture Organization of the United Nations (2017) *FAO Sustainable Grasslands*  
310 *Working Paper* Available at: <http://www.fao.org/nr/sustainability/grassland/en/%0A> [Accessed  
311 April 28, 2017].
- 312 29. Herrero M, et al. (2013) Biomass use, production, feed efficiencies, and greenhouse gas  
313 emissions from global livestock systems. *Proc Natl Acad Sci U S A* 110(52):20888–93.
- 314
